# Supplementary material for: Investigation of near-global daytime boundary layer height using high-resolution radiosondes: First results and comparison with ERA-5, MERRA-2, JRA-55, and NCEP-2 reanalyses
Source: Copernicus journal article supplement (doi:10.5194/acp-2021-257), 2021-05-17
Supplement: Supplementary file 1 [file acp-2021-257-supplement.pdf]

*Supplementary Materials for*

**Investigation of near-global daytime boundary layer height  
using high-resolution radiosondes: First results and  
comparison with ERA-5, MERRA-2, JRA-55, and NCEP-2  
reanalyses**

Jianping Guo<sup>a</sup>, Jian Zhang<sup>b</sup>, Kun Yang<sup>c</sup>, Hong Liao<sup>d</sup>, Shaodong Zhang<sup>e</sup>, Kaiming Huang<sup>e</sup>, Yanmin Lv<sup>a</sup>, Jia Shao<sup>f</sup>, Tao Yu<sup>b</sup>, Bing Tong<sup>a</sup>, Jian Li<sup>a</sup>, Tianning Su<sup>g</sup>, Steve H.L. Yim<sup>h,i</sup>, Ad Stoffelen<sup>j</sup>, Panmao Zhai<sup>a</sup>, and Xiaofeng Xu<sup>k</sup>

<sup>a</sup> State Key Laboratory of Severe Weather, Chinese Academy of Meteorological Sciences, Beijing 100081, China

<sup>b</sup> Hubei Subsurface Multi-scale Imaging Key Laboratory, Institute of Geophysics and Geomatics, China University of Geosciences, Wuhan 430074, China

<sup>c</sup> Department of Earth System Science, Tsinghua University, Beijing 100084, China

<sup>d</sup> Nanjing University of Information Science and Technology, Nanjing 210044, China

<sup>e</sup> School of Electronic Information, Wuhan University, Wuhan 430072, China

<sup>f</sup> College of Informatics, Huazhong Agricultural University, Wuhan 430070, China

<sup>g</sup> Department of Atmospheric and Oceanic Sciences, University of Maryland, College Park, Maryland 20740, USA

<sup>h</sup> Department of Geography and Resource Management, The Chinese University of Hong Kong, Shatin, Hong Kong, China

<sup>i</sup> Stanley Ho Big Data Decision Analytics Research Centre, The Chinese University of Hong Kong, Shatin, Hong Kong, China

<sup>j</sup> The Royal Netherlands Meteorological Institute (KNMI), 3730 AE De Bilt, The Netherlands

<sup>k</sup> China Meteorological Administration, Beijing 100081, China

**This supplementary file contains Figures S1-2**

Correspondence to:

Dr. Jian Zhang (Email: [zhangjian@cug.edu.cn](mailto:zhangjian@cug.edu.cn))

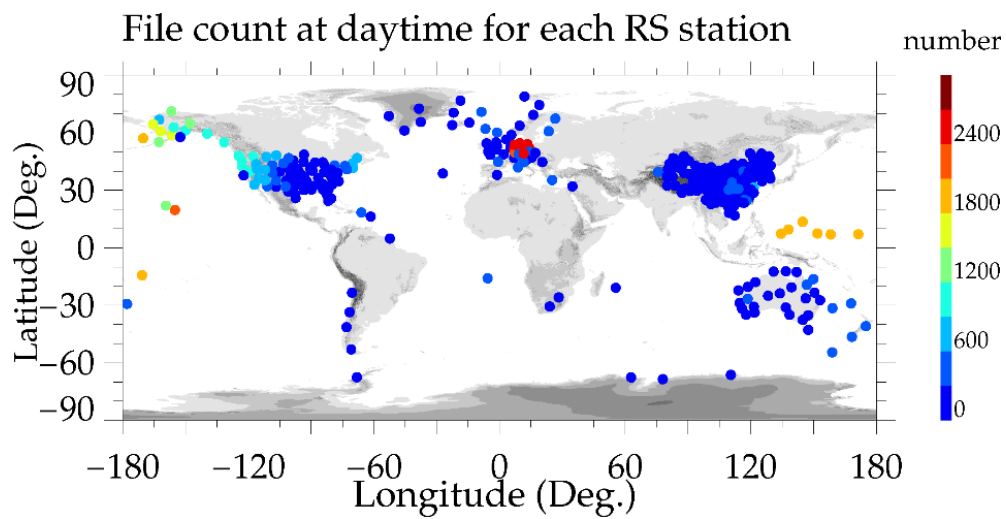

**Figure S1.** Profile count of radiosonde station in the daytime.

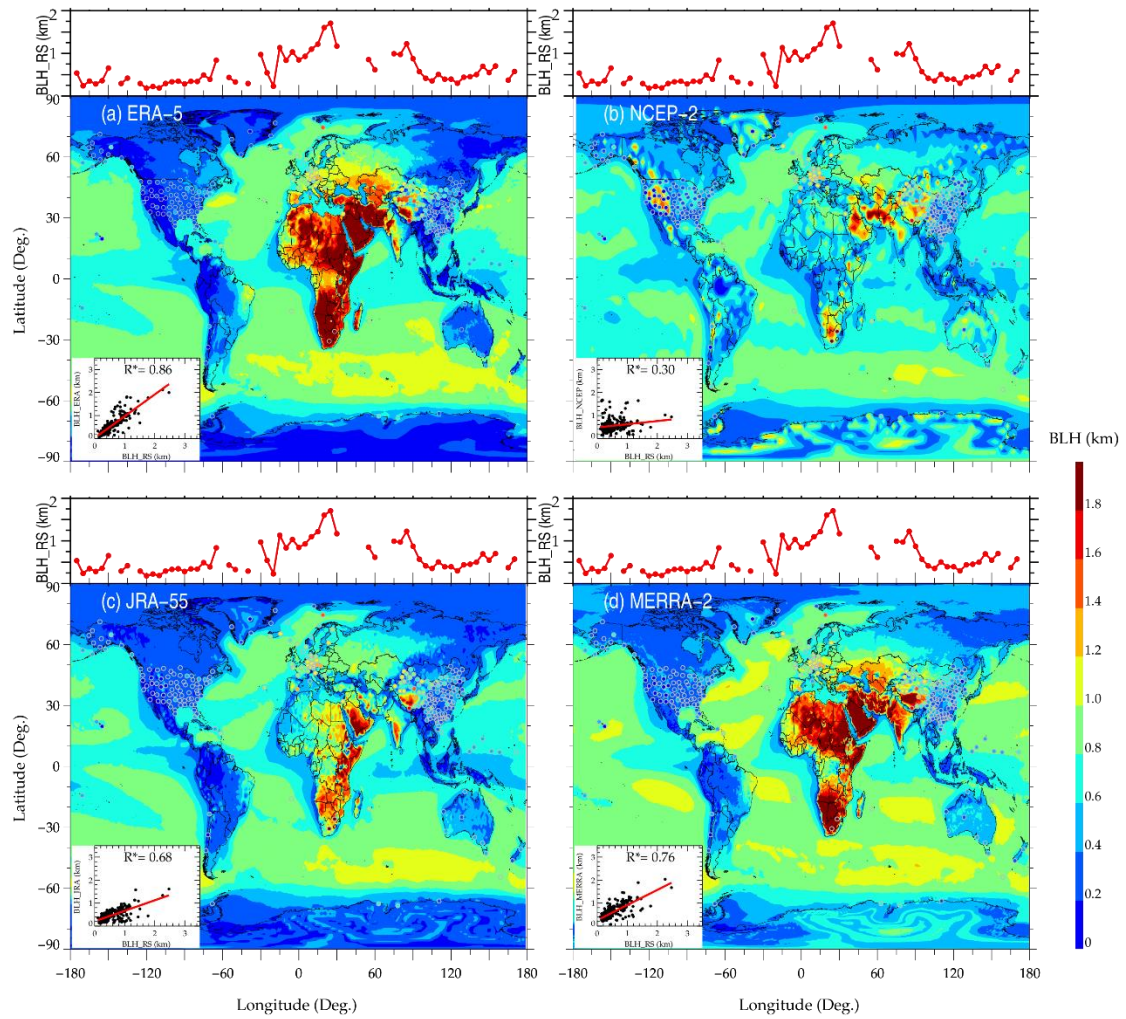

**Figure S2.** Ensemble mean BLH estimated from ERA-5 (a), NCEP-2 (b), JRA-55 (c), and MERRA-2 (d) reanalysis data at 1200 UTC during the years 2012-2019. The dots with gray marginal lines in each map denote the mean BLH derived by sondes at 1200 UTC. The station with less than 10 profiles are not included for further analysis. The 2D scatter plot in the left bottom of each panel illustrates the correlations between reanalysis-derived and sonde-derived BLHs at 1200 UTC, where the star superscripts indicate that the correlation coefficients are statistically significant ( $p < 0.05$ ) and the red lines denote the least-squares regression line.
